# Supplementary material for: A MOF nanoparticle@carbon aerogel integrated photothermal catalytic microreactor for CO2 utilization
Source: Royal Society of Chemistry journal article supplement (doi:10.1039/d4cc00635f), 2024-01-01

## **A MOF Nanoparticle@Carbon Aerogel Integrated Photothermal Catalytic Microreactor for CO<sub>2</sub> Utilization**

*Junyi Chen<sup>a\*</sup>, Lei Shao<sup>b</sup>, Bing Zhang<sup>b</sup>, Weiliang Tian<sup>a</sup>, Yu Fu<sup>b</sup>, Liying Zhang<sup>b\*</sup>*

<sup>a</sup> Engineering Laboratory of Chemical Resources Utilization in South Xinjiang,

College of Chemistry and Chemical Engineering, Tarim University, Xinjiang Uygur

Autonomous Region, Alaer, 843300, P. R. China

E-mail: sln5xn@163.com

<sup>b</sup> Department of Chemistry, College of Sciences, Northeastern University, Shenyang

110819, China

## Experimental section

**Chemicals.** Copper sulfate ( $\text{CuSO}_4 \cdot 5\text{H}_2\text{O}$ ), copper nitrate ( $\text{Cu}(\text{NO}_3)_2 \cdot 3\text{H}_2\text{O}$ ), potassium hydroxide (KOH) and 1,3,5-Benzenetricarboxylic acid ( $\text{H}_3\text{BTC}$ ) were purchased from Energy Chemical (Shanghai). Carboxyl methyl cellulose (CMC) were purchased from Macklin Biochemical (Shanghai). Tetrabutylammonium bromide (TBAB) and styrene oxide were purchased from Sigma-Aldrich. 1, 4-dioxane and ethanol ( $\text{C}_2\text{H}_5\text{OH}$ ) were purchased from Sinopharm Chemical Reagent Co., Ltd. The water used in this work was deionized water. All chemicals used in this work were analytical grade and without further purification.

**Fabrication of  $\text{Cu}(\text{OH})_2$ @CMC aerogel.** 56.1 mg KOH 330 mg was dissolved in 25 mL  $\text{H}_2\text{O}$ , and 124 mg  $\text{CuSO}_4 \cdot 5\text{H}_2\text{O}$  was dissolved in 5 mL  $\text{H}_2\text{O}$ . The  $\text{Cu}(\text{OH})_2$  colloidal solution can be obtained by adding the  $\text{CuSO}_4$  solution to the stirred KOH solution drop by drop. Then 495 mg CMC was dissolved in above  $\text{Cu}(\text{OH})_2$  colloidal solution with stirring for 8 h to obtain the homogeneous mixed colloidal solution. And the  $\text{Cu}(\text{OH})_2$ @CMC aerogel was formed after freeze-drying.

**Fabrication of carbon aerogel ( $\text{CuO@CA}$ ).** The  $\text{Cu}(\text{OH})_2$ @CMC aerogels were subsequently annealed at 400 °C for 2 h under Ar atmosphere to obtain the carbon aerogel ( $\text{CuO@CA}$ ).

**Fabrication of n-MOF@CA carbon aerogel.** 14.5 mg ( $\text{Cu}(\text{NO}_3)_2 \cdot 3\text{H}_2\text{O}$ ) and 8.4 mg  $\text{H}_3\text{BTC}$  was dissolved in 1 mL mixed solvent of DMF and  $\text{CH}_3\text{OH}$  (V:V = 1:1). Then, the mixture is dripped and wetted onto the obtained  $\text{CuO@CA}$  ( $\sim 1 \text{ cm}^3$ ). And the carbon

aerogel with mixture subsequently was moved to the heating table at 120 °C, with the evaporation of the solvent, the carbon aerogel was dried to obtain n-MOF@CA carbon aerogel.

**Catalytic ability of n-MOF@CA for CO<sub>2</sub> cycloaddition reaction.** The n-MOF@CA was wetted by the mixture of 1.31 mmol styrene oxide and 0.1 mmol TBAB. And the n-MOF@CA was placed into a quartz vessel equipped with CO<sub>2</sub> atmosphere (1 atm). Then, the cycloaddition reaction system was irradiated with a Xe lamp for 12 h. After the reaction, the reactant was washed by 1,4-dioxane and analyzed by gas chromatography method.

**Characterizations.** Morphologies of samples were characterized by field-emission scanning electron microscopy (FESEM, Hitachi SU8010). The crystallographic information was analyzed by X-ray diffraction (XRD, PANalytical Empyrean) equipped with a Cu K $\alpha$  radiation source ( $\lambda = 1.5406 \text{ \AA}$ ). The specific surface area was calculated by using the Brunauer-Emmett-Teller (BET, Micromeritics ASAP2020). The organic groups in the nanoporous metallic networks were characterized by Fourier transform infrared spectroscopy (FT-IR, Bruker VERTEX 70). Thermogravimetric analysis (TGA) was carried out with a thermobalance (TGA-2050, TA Instruments) under N<sub>2</sub> from room temperature to 600 °C with a temperature ramp of 10 °C min<sup>-1</sup>.

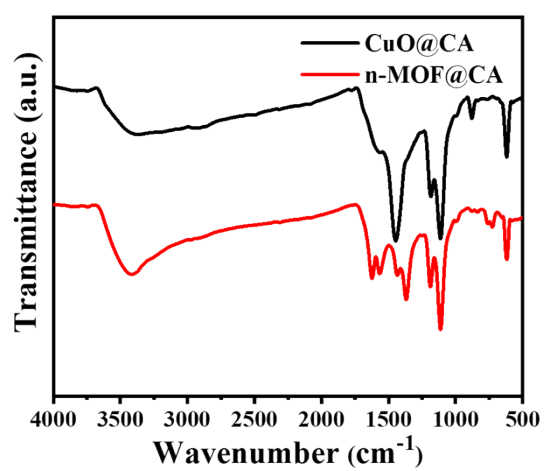

**Fig. S1** FT-IR spectra of CuO@CA and n-MOF@CA.

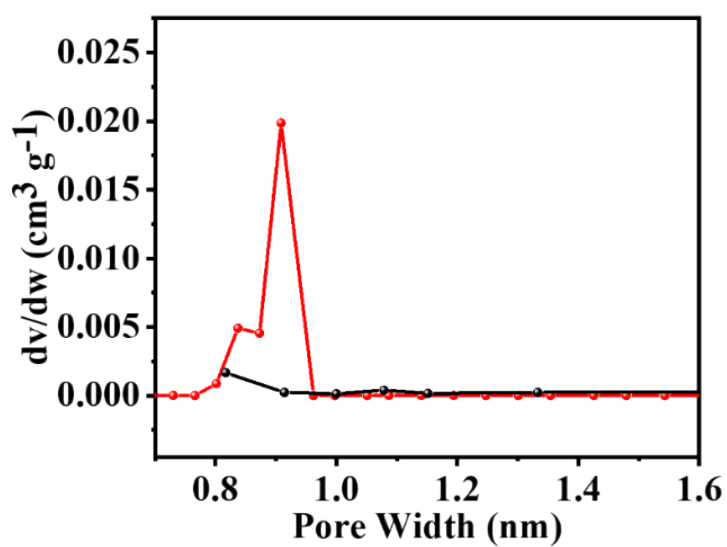

**Fig. S2** The pore-size distribution curves of CuO@CA and n-MOF@CA.

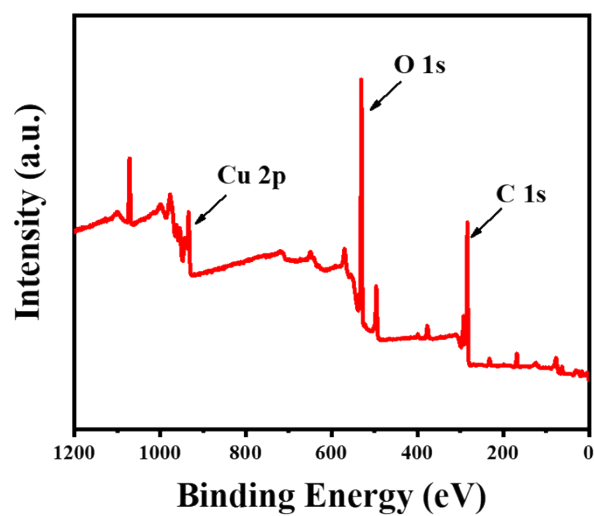

**Figure S3.** The XPS analysis of n-MOF@CA.

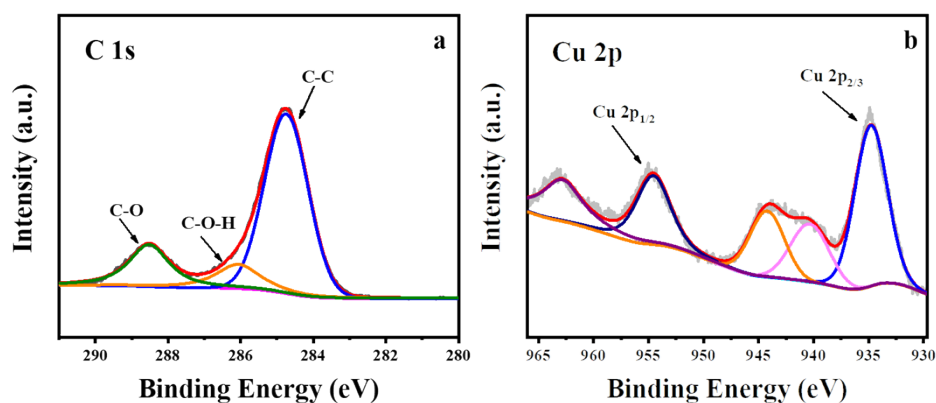

**Fig. S4** The high resolution XPS spectra of n-MOF@CA at (a) C region and (b) Cu region.

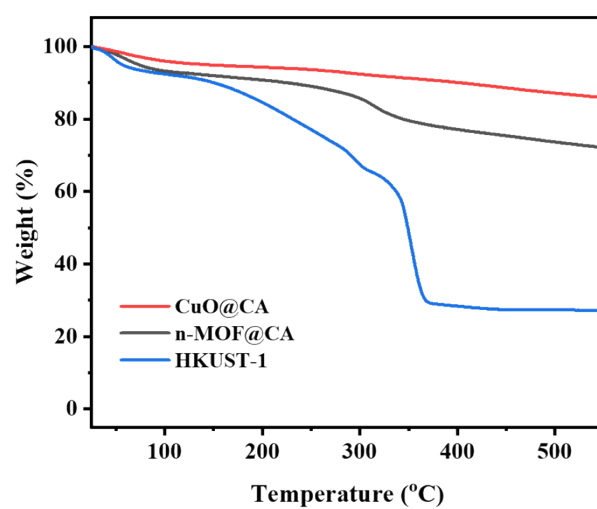

**Fig. S5** The TGA curves of HKUST-1, CuO@CA and n-MOF@CA.

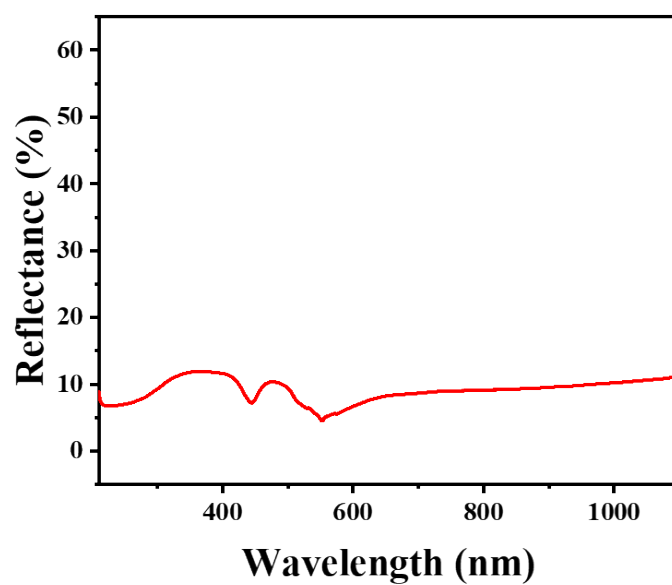

**Fig. S6** Reflection spectrum of n-MOF@CA.

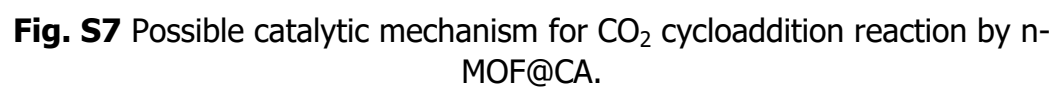

Supplement: d4cc00635f1.pdf [file d4cc00635f1.pdf]
